# Supplementary material for: Structural and electronic features of binary Li2S-P2S5 glasses
Source: PubMed Central journal article supplement (PMC4759574; doi:10.1038/srep21302), 2016-02-19
Supplement: srep21302-s1.pdf [file srep21302-s1.pdf]

## Supplementary Information for

### Structural and electronic features of binary $\text{Li}_2\text{S-P}_2\text{S}_5$ glasses

Koji Ohara<sup>1</sup>, Akio Mitsui<sup>1,2</sup>, Masahiro Mori<sup>1</sup>, Yohei Onodera<sup>3</sup>, Shinya Shiotani<sup>1</sup>, Yukinori Koyama<sup>1</sup>, Yuki Oriyasa<sup>4</sup>, Miwa Murakami<sup>1</sup>, Keiji Shimoda<sup>1</sup>, Kazuhiro Mori<sup>3</sup>, Toshiharu Fukunaga<sup>3</sup>, Hajime Arai<sup>1</sup>, Yoshiharu Uchimoto<sup>4</sup>, and Zempachi Ogumi<sup>1</sup>

#### Affiliations

<sup>1</sup>Office of Society-Academia Collaboration for Innovation, Kyoto University, Gokasho, Uji, Kyoto 611-0011, Japan

<sup>2</sup>Material Analysis Department, Material Development Division, TOYOTA MOTOR CORPORATION, 1, Toyota-cho, Toyota, Aichi 471-8572, Japan

<sup>3</sup>Research Reactor Institute, Kyoto University, 2-1010 Asashiro-Nishi, Kumatori-cho, Sennan-gun, Osaka 590-0494, Japan

<sup>4</sup>Graduate School of Human and Environmental Studies, Kyoto University, Yoshida-nihonmatsu-cho, Sakyo-ku, Kyoto 606-8501, Japan

## Figures

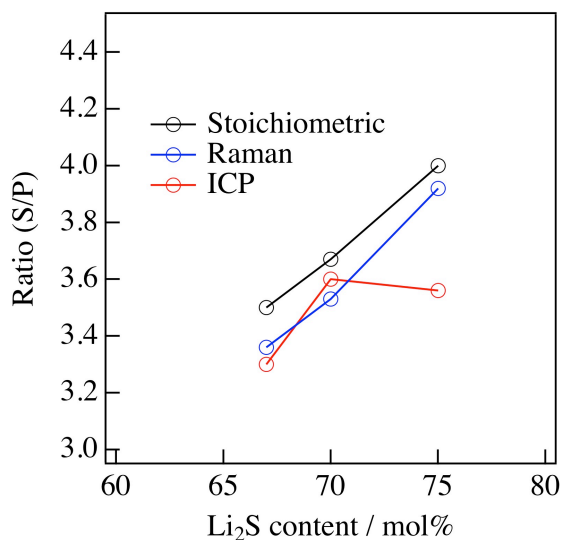

Figure S1 Ratio of sulfur to phosphorus for Li<sub>2</sub>S-P<sub>2</sub>S<sub>5</sub> glasses at room temperature determined using the stoichiometry, Raman spectra, and an Inductively Coupled Plasma (ICP) analysis, respectively.

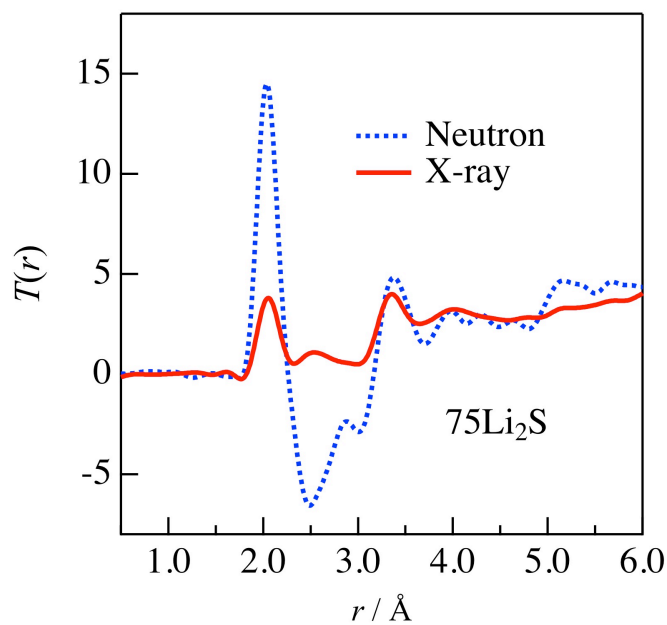

Figure S2 Total pair correlation functions  $T(r)$  for 75Li<sub>2</sub>S glasses derived from X-ray (red solid line) and neutron (blue dotted line) diffraction.

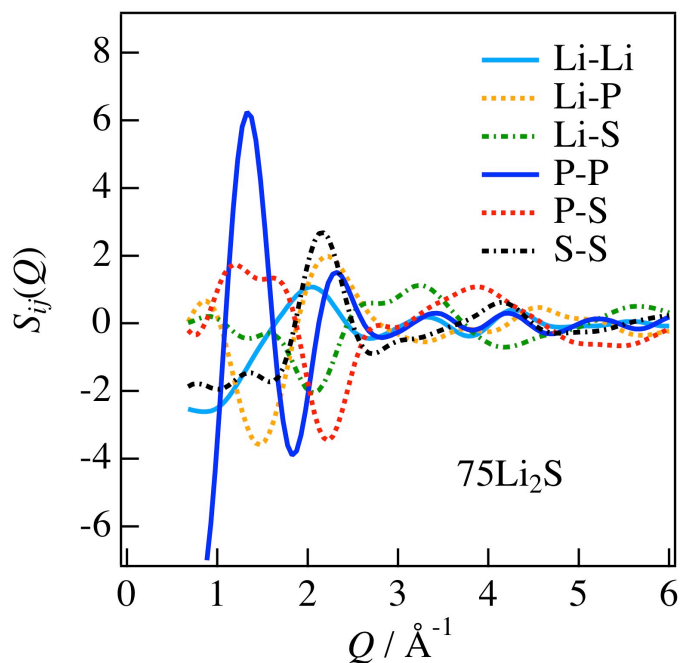

Figure S3 Partial structure factors  $S(Q)$  for Li-Li (light blue solid line), Li-P (orange dotted line), Li-S (green dashed line), P-P (blue solid line), P-S (red dotted line), and S-S (black dashed line) derived from DFT/RMC model for  $75\text{Li}_2\text{S}$  glass.

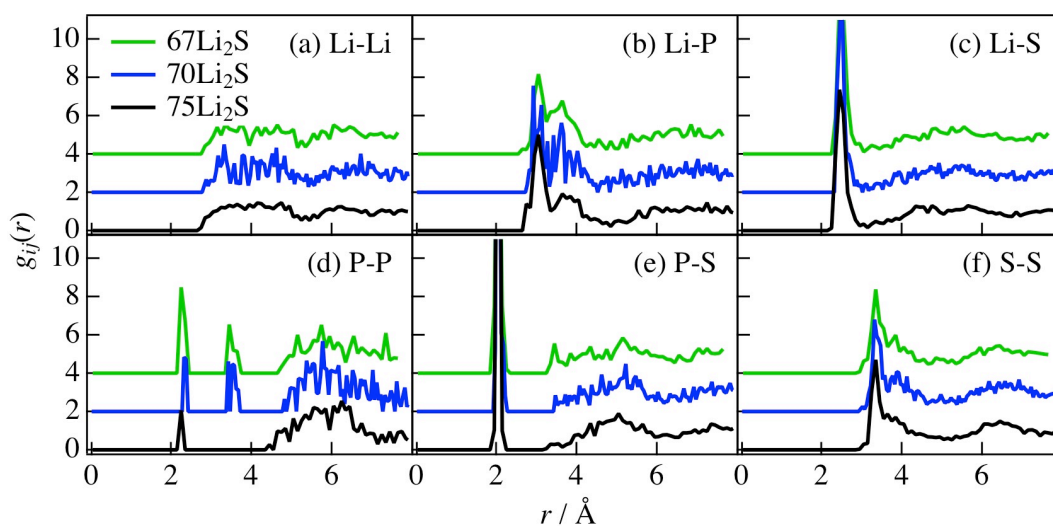

Figure S4 Partial pair distribution functions  $g_{ij}(r)$  for Li-Li (a), Li-P (b), Li-S (c), P-P (d), P-S (e), and S-S (f) derived from DFT/RMC model for  $\text{Li}_2\text{S}-\text{P}_2\text{S}_5$  glasses. Line colors correspond to those in Fig. 1.

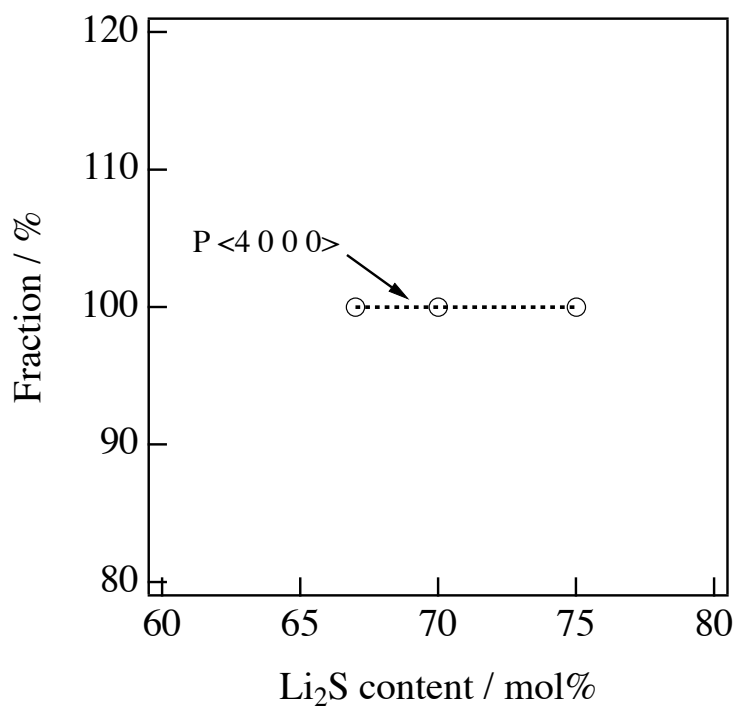

Figure S5 P-centered Voronoi polyhedra in the Li<sub>2</sub>S-P<sub>2</sub>S<sub>5</sub> glasses calculated up to 2.5 Å.

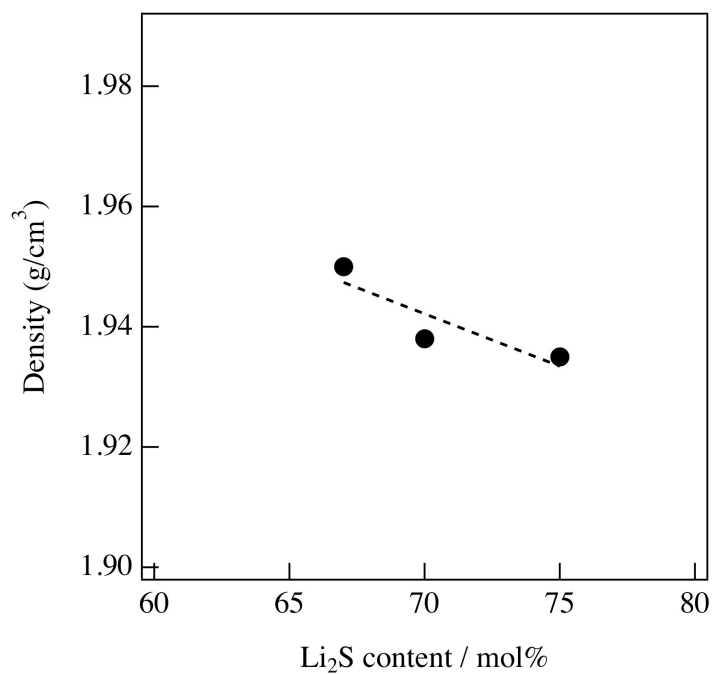

Figure S6 Densities of Li<sub>2</sub>S-P<sub>2</sub>S<sub>5</sub> glasses at room temperature determined using a pycnometer.

## Table

Table S1. Distributions of Li- and P-centered Voronoi polyhedra for Li<sub>2</sub>S-P<sub>2</sub>S<sub>5</sub> glasses up to  $r = 3.2$  Å derived from DFT/RMC model, which is assigned by a Voronoi index  $\langle n_3, n_4, n_5, n_6 \rangle$ , where  $n_i$  denotes the number of  $i$ -edged faces and  $\sum_i n_i$  is the total coordination number.

| Voronoi index                | Coordination number | 67Li <sub>2</sub> S (%) |            | 70Li <sub>2</sub> S (%) |            | 75Li <sub>2</sub> S (%) |            |
|------------------------------|---------------------|-------------------------|------------|-------------------------|------------|-------------------------|------------|
|                              |                     | Li-centered             | P-centered | Li-centered             | P-centered | Li-centered             | P-centered |
| $\langle 4\ 0\ 0\ 0 \rangle$ | 4                   | 25.86                   | 46.43      | 30.00                   | 33.33      | 19.71                   | 14.89      |
| $\langle 2\ 3\ 0\ 0 \rangle$ | 5                   | 44.83                   | 42.86      | 44.29                   | 46.67      | 40.88                   | 57.45      |
| $\langle 0\ 6\ 0\ 0 \rangle$ | 6                   | 5.17                    | 0          | 5.71                    | 3.33       | 4.38                    | 4.26       |
| $\langle 2\ 2\ 2\ 0 \rangle$ | 6                   | 15.52                   | 10.71      | 10.00                   | 13.33      | 19.71                   | 17.02      |
| $\langle 1\ 3\ 3\ 0 \rangle$ | 7                   | 0                       | 0          | 2.86                    | 0          | 3.65                    | 4.26       |
| $\langle 2\ 2\ 2\ 1 \rangle$ | 7                   | 0                       | 0          | 1.43                    | 0          | 0                       | 2.13       |
| $\langle 0\ 5\ 2\ 0 \rangle$ | 7                   | 1.72                    | 0          | 1.43                    | 0          | 1.46                    | 0          |
| $\langle 3\ 0\ 3\ 1 \rangle$ | 7                   | 0                       | 0          | 1.43                    | 0          | 0                       | 0          |
